# Supplementary material for: Gene introduction into the mitochondria of Arabidopsis thaliana via peptide-based carriers
Source: PubMed Central journal article supplement (PMC4291575; doi:10.1038/srep07751), 2015-01-13
Supplement: srep07751-s1.pdf [file srep07751-s1.pdf]

Gene introduction into the mitochondria of *Arabidopsis thaliana* via peptide-based carriers

Jo-Ann Chuah<sup>1</sup>, Takeshi Yoshizumi<sup>2</sup>, Yutaka Kodama<sup>3</sup> & Keiji Numata<sup>1,\*</sup>

<sup>1</sup>Enzyme Research Team, Biomass Engineering Program Cooperation Division,  
Center for Sustainable Resource Science, RIKEN, 2-1 Hirosawa, Wako-shi, Saitama  
351-0198, Japan

<sup>2</sup>Institute for Advanced Biosciences, Keio University, 403-1 Nipponkoku, Daihoji,  
Tsuruoka, Yamagata 997-0017, Japan

<sup>3</sup>Center for Bioscience Research and Education, Utsunomiya University, Tochigi 321-  
8505, Japan

\* Correspondence should be addressed to K.N. (keiji.numata@riken.jp).

## **Contents**

**Supplementary Figure 1** Efficiency of pDNA delivery mediated by individual components of the designed peptide-based carrier.

**Supplementary Figure 2** Observation of CPP-MTP<sub>KH</sub>-pDNA complexes by scanning electron microscopy.

**Supplementary Figure 3** Cytosolic expression of RLuc gene under the control of different promoters.

**Supplementary Table 1** Particle size and polydispersity index (PDI) of particles formed by complexation of pDNA with MTP<sub>KH</sub> (N/P 0.5) and CPP.

**Supplementary Figure 1** Efficiency of pDNA delivery mediated by individual components of the designed peptide-based carrier.

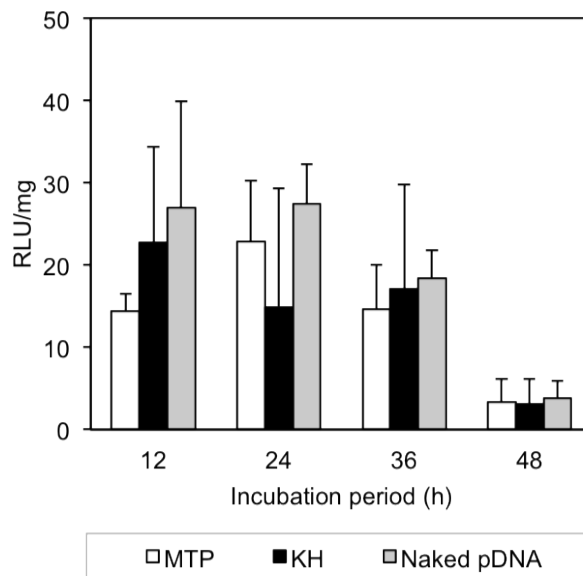

MTP or lysine-histidine copolymer (KH) were used for complexation with pDNA before infiltration into the leaves of *A. thaliana* and incubated for various time periods (12 h, 24 h, 36 h and 48 h) prior to evaluation by RLuc assay. Naked pDNA, treated in the same manner as the peptide-pDNA complexes, served as negative control. Error bars represent standard deviations ( $n = 4$ ). Complexes formed using MTP or lysine-histidine copolymer (N/P 0.5) or naked pDNA, when delivered to leaves, mediated negligible levels of expression.

**Supplementary Figure 2** Observation of CPP-MTP<sub>KH</sub>-pDNA complexes by scanning electron microscopy.

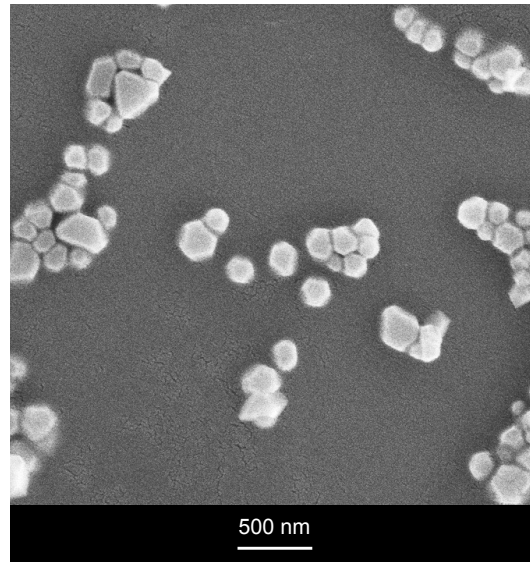

Complexes formed by sequential addition of peptides to pDNA (MTP<sub>KH</sub> at N/P 0.5 followed by CPP at N/P 0.5) were relatively uniform in size (approximately 200 nm).

**Supplementary Figure 3** Cytosolic expression of RLuc gene under the control of different promoters.

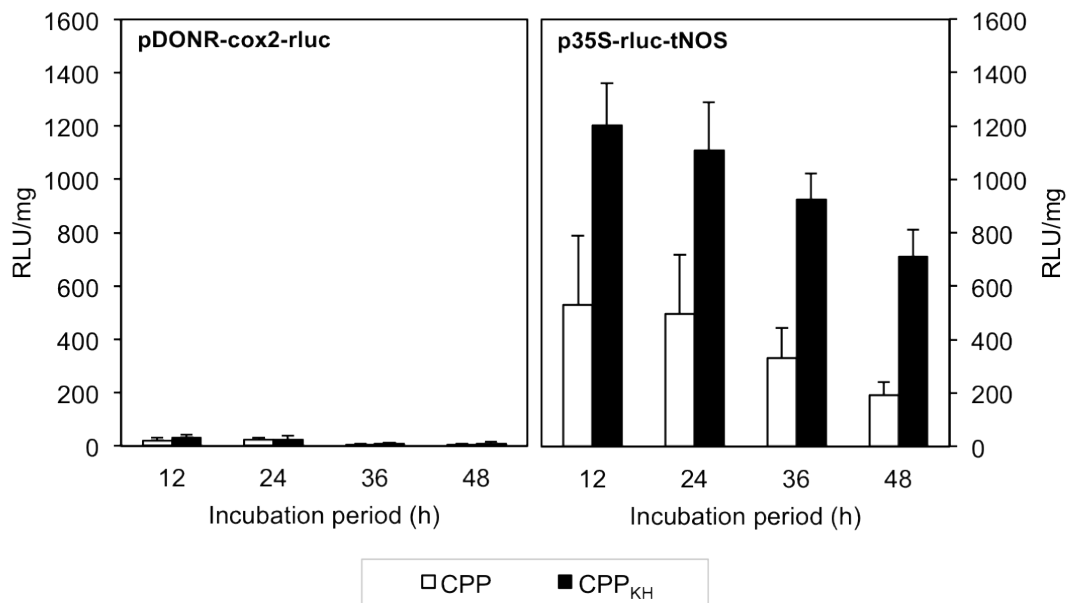

Plasmid constructs containing the RLuc gene expressed by a mitochondrial promoter (pDONR-cox2-rluc) or cytosolic promoter (p35S-rluc-tNOS) were delivered into the cell cytoplasm using either CPP or CPP<sub>KH</sub>. Evaluation by RLuc assay, following various incubation periods (12 h, 24 h, 36 h and 48 h), showed that the mitochondrial-specific cox2 promoter mediates only negligible levels of RLuc gene expression in the cytoplasm. Functionality of CPP and CPP<sub>KH</sub> were confirmed by the noticeably higher levels of RLuc gene expression driven by the constitutive p35S promoter. Error bars represent standard deviations ( $n = 4$ ).

**Supplementary Table 1** Particle size and polydispersity index (PDI) of particles formed by complexation of pDNA with MTP<sub>KH</sub> (N/P 0.5) and CPP.

| N/P ratio | Average mean hydrodynamic diameter (nm) | PDI |
|-----------|-----------------------------------------|-----|
| 50        | 2160                                    | 0.7 |
| 100       | 1620                                    | 0.7 |

N/P is defined as the number of amine groups from the peptide divided by the number of phosphate groups from pDNA. The addition of higher concentrations of CPP (N/P 50 or N/P 100) caused aggregates to form, resulting in formulations with large variability in size (based on the high PDI values).
